# Supplementary material for: Bioremediation of Per- and Poly-Fluoroalkyl Substances (PFAS) by Synechocystis sp. PCC 6803: A Chassis for a Synthetic Biology Approach
Source: MDPI journal article supplement (doi:10.3390/life11121300), 2021-11-26
Supplement: s1 [file s1]

Article

# Bioremediation of Per- and Poly-Fluoroalkyl Substances (PFAS) by *Synechocystis* sp. PCC 6803: A Chassis for a Synthetic Biology Approach

Francesca Marchetto <sup>1,†</sup>, Marco Roverso <sup>2,†</sup>, Davide Righetti <sup>1,3</sup>, Sara Bogialli <sup>2</sup>, Francesco Filippini <sup>3</sup>, Elisabetta Bergantino <sup>3</sup> and Eleonora Sforza <sup>1,\*</sup>

<sup>1</sup> Department of Industrial Engineering DII, University of Padova, 35131 Padova, Italy; marchetto.francesca95@gmail.com (F.M.); davide.righetti.1@studenti.unipd.it (D.R.)

<sup>2</sup> Department of Chemical Sciences, University of Padova, 35131 Padova, Italy; marco.roverso@unipd.it (M.R.); sara.bogialli@unipd.it (S.B.)

<sup>3</sup> Department of Biology, University of Padova, 35131 Padova, Italy; francesco.filippini@unipd.it (F.F.); elisabetta.bergantino@unipd.it (E.B.)

\* Correspondence: eleonora.sforza@unipd.it; Tel.: +39-049-827-5267

† These authors contributed equally to this work.

## Supplementary Material:

**Table S1.** Candidate *Synechocystis* proteins possibly involved in PFASs transport and/or metabolism. \* Found in *Synechocystis* PCC 6803.

| Name                                                            | Biochemical function                           | Sequence(s) | Accession      | % similarity                                 |
|-----------------------------------------------------------------|------------------------------------------------|-------------|----------------|----------------------------------------------|
| Na <sup>+</sup> -taurocholate cotransporting polypeptide (NTCP) | Bile acid:sodium symporter                     | 8           | WP_028947894.1 | 27–29% to Human NTCP, NTCP2, NTCP4 and NTCP7 |
|                                                                 |                                                |             | WP_010872629.1 |                                              |
|                                                                 |                                                |             | WP_162328214.1 |                                              |
|                                                                 |                                                |             | MBE9176556.1   |                                              |
|                                                                 |                                                |             | WP_194071296.1 |                                              |
|                                                                 |                                                |             | WP_190599003.1 |                                              |
|                                                                 |                                                |             | WP_194019469.1 |                                              |
|                                                                 |                                                |             | WP_194014785.1 |                                              |
| ATP binding cassette transporter C family member (ABCC)         | ATP-binding cassette domain-containing protein | 40          | WP_194072738.1 | 23–42% to <i>Arabidopsis thaliana</i> ABCC2  |
|                                                                 |                                                |             | WP_194018933.1 |                                              |
|                                                                 |                                                |             | WP_190596069.1 |                                              |
|                                                                 |                                                |             | WP_194015207.1 |                                              |
|                                                                 |                                                |             | WP_162327634.1 |                                              |
|                                                                 |                                                |             | WP_199303459.1 |                                              |
|                                                                 |                                                |             | WP_190597748.1 |                                              |
|                                                                 |                                                |             | WP_162327599.1 |                                              |
|                                                                 |                                                |             | WP_194018815.1 |                                              |
|                                                                 |                                                |             | WP_194013374.1 |                                              |
|                                                                 |                                                |             | WP_194013374.1 |                                              |
|                                                                 |                                                |             | WP_162327849.1 |                                              |
|                                                                 |                                                |             | WP_190598847.1 |                                              |
|                                                                 |                                                |             | WP_194014885.1 |                                              |
|                                                                 |                                                |             | WP_194018910.1 |                                              |
|                                                                 |                                                |             | WP_190597363.1 |                                              |
|                                                                 |                                                |             | WP_194073247.1 |                                              |
|                                                                 |                                                |             | WP_162329505.1 |                                              |
|                                                                 |                                                |             | WP_162327719.1 |                                              |

|                                     |    |                                                                                                                                                                                                                                                                                                                                                                                                                                                                                                                                                      |                                             |
|-------------------------------------|----|------------------------------------------------------------------------------------------------------------------------------------------------------------------------------------------------------------------------------------------------------------------------------------------------------------------------------------------------------------------------------------------------------------------------------------------------------------------------------------------------------------------------------------------------------|---------------------------------------------|
|                                     |    | WP_194015044.1<br>WP_162327093.1<br>WP_194073659.1<br>WP_194016394.1<br>WP_028946876.1<br>WP_194015365.1<br>WP_194017886.1<br>WP_194017886.1<br>WP_162328301.1<br>WP_194015754.1<br>WP_194020455.1<br>WP_190596393.1<br>WP_194072749.1<br>WP_190599643.1<br>WP_162329061.1<br>WP_190597943.1<br>WP_162327446.1<br>WP_194015181.1<br>WP_190596040.1<br>MBE9175611.1<br>WP_194020078.1                                                                                                                                                                 |                                             |
|                                     |    | MBE9175251.1<br>WP_028948219.1<br>WP_010871936.1<br>MBE9174824.1<br>WP_028948200.1<br>WP_010871895.1<br>WP_009633118.1<br>WP_028947992.1<br>WP_028947381.1<br>WP_071822647.1<br>WP_009630252.1<br>WP_009632343.1<br>WP_010873840.1<br>WP_009632727.1<br>WP_028954270.1<br>WP_051738793.1<br>WP_009632913.1<br>WP_028949030.1<br>WP_010871235.1<br>WP_010872070.1<br>WP_028947037.1<br>WP_009632475.1<br>WP_028949033.1<br>WP_009631388.1<br>WP_009632594.1<br>WP_010871241.1<br>WP_162329293.1<br>WP_028947003.1<br>WP_010874137.1<br>WP_194020635.1 |                                             |
| ABC transporter ATP-binding protein | 44 |                                                                                                                                                                                                                                                                                                                                                                                                                                                                                                                                                      | 23–36% to <i>Arabidopsis thaliana</i> ABCC2 |

|                                                                          |                                               |    |                                                                                                                                                                                                                                                  |                                                |
|--------------------------------------------------------------------------|-----------------------------------------------|----|--------------------------------------------------------------------------------------------------------------------------------------------------------------------------------------------------------------------------------------------------|------------------------------------------------|
|                                                                          |                                               |    | MBE9174726.1<br>WP_010872849.1<br>WP_051738954.1<br>WP_051482607.1<br>WP_009633356.1<br>WP_028949247.1<br>AIE73207.1<br>WP_009631439.1<br>MBE9174324.1<br>WP_028954202.1<br>WP_009633629.1<br>WP_028947788.1<br>WP_010873804.1<br>WP_009633685.1 |                                                |
| peptidase domain-containing ABC transporter                              | 5                                             |    | MBE9175630.1<br>WP_010872887.1<br>WP_028948277.1<br>WP_009630782.1<br>WP_010874249.1                                                                                                                                                             | 23–27% to <i>Arabidopsis thaliana</i> ABCC2    |
| type I secretion system permease/ATPase                                  | 2                                             |    | WP_194013658.1<br>WP_162328330.1                                                                                                                                                                                                                 | 25–28% to <i>Arabidopsis thaliana</i> ABCC2    |
| ABC transporter *                                                        | 3                                             |    | AGF51262.1<br>QHV01854.1<br>ALJ68769.1*<br>AGF51262.1*<br>ALJ69526.1*<br>WP_014407101.1*                                                                                                                                                         | 27–29% to <i>Arabidopsis thaliana</i> ABCC2    |
| TOBE-like domain-containing protein                                      | 2                                             |    | WP_190598704.1<br>WP_009631742.1                                                                                                                                                                                                                 | 30–34% to <i>Arabidopsis thaliana</i> ABCC2    |
| Multidrug resistance ABC transporter ATP-binding and permease protein    | 1                                             |    | AIE74659.1                                                                                                                                                                                                                                       | 36% to <i>Arabidopsis thaliana</i> ABCC2       |
| cyclic nucleotide-regulated ABC bacteriocin/lantibiotic exporter protein | 1                                             |    | AVH79543.1                                                                                                                                                                                                                                       | 26% to <i>Arabidopsis thaliana</i> ABCC2       |
| ATP-binding protein of ABC transporter                                   | 1                                             |    | AIE73432.1                                                                                                                                                                                                                                       | 31% to <i>Arabidopsis thaliana</i> ABCC2       |
| Aquaporin (aqp)                                                          | Aquaporin                                     | 8  | WP_162328075.1<br>WP_028946756.1<br>MBE9176180.1<br>WP_194015914.1<br>WP_190599016.1<br>WP_009631497.1<br>WP_194073056.1<br>WP_009633089.1                                                                                                       | 37–100% to <i>Synechocystis</i> PCC 6803 aqpZ  |
| Laccase                                                                  | Multicopper oxidase domain-containing protein | 1  | WP_194014464.1                                                                                                                                                                                                                                   | 24% to <i>Pleurotus ostreatus</i> laccase POX1 |
| Fluoroacetate dehalogenase                                               | Alpha/beta hydrolase                          | 19 | WP_009633998.1<br>WP_009634094.1<br>WP_028949175.1<br>WP_010872272.1                                                                                                                                                                             | 25–39% to <i>Burkholderia</i> sp. Fac-dex      |

|                           |    |                |                                   |
|---------------------------|----|----------------|-----------------------------------|
|                           |    | WP_028946933.1 |                                   |
|                           |    | WP_028954141.1 |                                   |
|                           |    | WP_010871769.1 |                                   |
|                           |    | WP_106907929.1 |                                   |
|                           |    | WP_009634549.1 |                                   |
|                           |    | WP_009631931.1 |                                   |
|                           |    | WP_038531141.1 |                                   |
|                           |    | AIE75980.1     |                                   |
|                           |    | WP_010872160.1 |                                   |
|                           |    | QHV01713.1     |                                   |
|                           |    | WP_009630128.1 |                                   |
|                           |    | WP_010873707.1 |                                   |
|                           |    | WP_028948001.1 |                                   |
|                           |    | WP_038021267.1 |                                   |
|                           |    | QHV01001.1     |                                   |
|                           |    | WP_194019009.1 |                                   |
|                           |    | WP_194072249.1 |                                   |
|                           |    | WP_190599725.1 |                                   |
|                           |    | WP_162327898.1 |                                   |
|                           |    | WP_194013416.1 |                                   |
|                           |    | WP_190598114.1 |                                   |
|                           |    | WP_194020943.1 |                                   |
|                           |    | WP_194017332.1 |                                   |
|                           |    | WP_162327504.1 |                                   |
|                           |    | WP_038020775.1 |                                   |
|                           |    | WP_028947035.1 |                                   |
|                           |    | MBE9175246.1   |                                   |
|                           |    | WP_009631087.1 |                                   |
|                           |    | WP_190598236.1 |                                   |
|                           |    | WP_194019539.1 |                                   |
|                           |    | WP_162327488.1 |                                   |
|                           |    | WP_194073349.1 |                                   |
|                           |    | WP_162327505.1 | 22–40% to <i>Burkholderia</i> sp. |
| Alpha/beta fold hydrolase | 53 | WP_009630182.1 | Fac-dex                           |
|                           |    | WP_190598115.1 |                                   |
|                           |    | WP_010871750.1 |                                   |
|                           |    | WP_010871770.1 |                                   |
|                           |    | WP_194020945.1 |                                   |
|                           |    | WP_194017334.1 |                                   |
|                           |    | WP_194015193.1 |                                   |
|                           |    | WP_028947752.1 |                                   |
|                           |    | MBE9176742.1   |                                   |
|                           |    | WP_194020915.1 |                                   |
|                           |    | MBD2655166.1   |                                   |
|                           |    | WP_190599431.1 |                                   |
|                           |    | WP_194072888.1 |                                   |
|                           |    | WP_009630376.1 |                                   |
|                           |    | WP_162327789.1 |                                   |
|                           |    | WP_194018987.1 |                                   |
|                           |    | WP_194014523.1 |                                   |
|                           |    | WP_199303425.1 |                                   |

---

|                |
|----------------|
| WP_190599423.1 |
| MBE9176468.1   |
| WP_194072577.1 |
| WP_010872152.1 |
| WP_199303557.1 |
| WP_194018983.1 |
| WP_190599278.1 |
| WP_194013777.1 |
| WP_194019704.1 |
| MBE9175978.1   |
| WP_028946321.1 |
| WP_199309777.1 |
| WP_194014536.1 |
| WP_162327783.1 |
| WP_080504060.1 |
| WP_162329611.1 |
| WP_038530520.1 |

---
